# Supplementary material
Source: publisher figshare collection journal article supplement (https://acs.figshare.com/ndownloader/files/3799822)
Supplement: Supplementary file 1 [file 3799822]

## Supporting Information

### Writing Highly Ordered Macroscopic Patterns in Cylindrical Block Polymer Thin Films via Raster Solvent Vapor Annealing and Soft Shear

Ming Luo,<sup>†</sup> Douglas M. Scott,<sup>†</sup> Thomas H. Epps, III,<sup>\*,†,‡</sup>

<sup>†</sup> Department of Chemical and Biomolecular Engineering and <sup>‡</sup> Department of Materials Science and Engineering, University of Delaware, Newark, Delaware 19716, United States

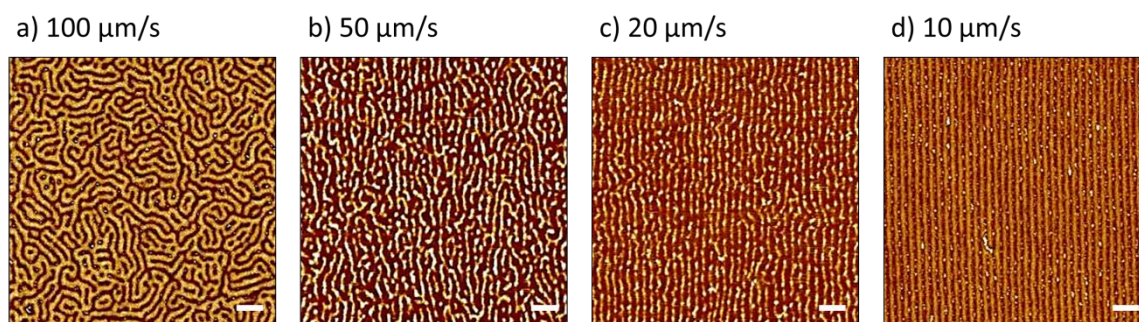

**Figure S1.** Atomic force microscopy (AFM) phase images of the poly(styrene-*b*-isoprene-*b*-styrene) [SIS] thin films processed at different rastering speeds (a) 100  $\mu\text{m/s}$ ; (b) 50  $\mu\text{m/s}$ ; (c) 20  $\mu\text{m/s}$ ; (d) 10  $\mu\text{m/s}$ . Scale bars represent 200 nm.

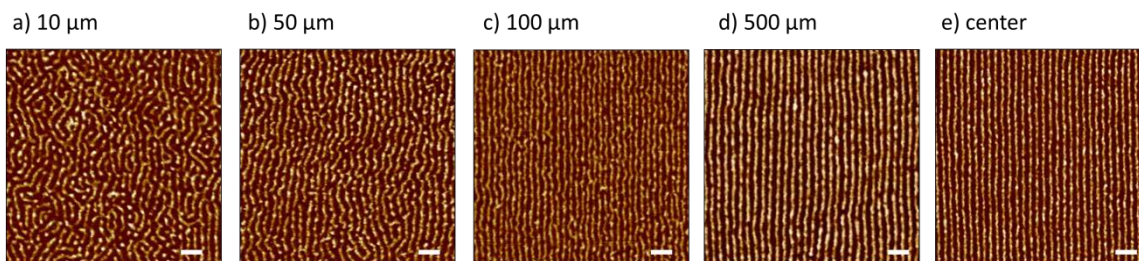

**Figure S2.** AFM phase images of the SIS thin films near the edge of the rastered region vs. center of the rastered area. The total rastered area was 4000  $\mu\text{m}$  (4 mm) wide. Distances from the edges are noted above the corresponding AFM phase images. Note: Approximately 95% of the rastered area shows high-quality cylinder alignment. Scale bars represent 200 nm.
